1       **Plasmacytoid dendritic cells produce type I interferon and reduce viral replication in**  
2                                       **airway epithelial cells after SARS-CoV-2 infection**

3  
4  
5   Luisa Cervantes-Barragan<sup>1\*</sup>, Abigail Vanderheiden<sup>2,3,4</sup>, Charlotte J. Royer<sup>1</sup>, Meredith E. Davis-  
6   Gardner<sup>2,3,4</sup>, Philipp Ralfs<sup>3,4,5</sup>, Tatiana Chirkova<sup>2</sup>, Larry J. Anderson<sup>2,4</sup>, Arash Grakoui<sup>1,3,4,5</sup>, Mehul  
7   S. Suthar<sup>1,2,4,5,6\*</sup>

8  
9  
10  
11  
12  
13   <sup>1</sup>Department of Microbiology and Immunology, Emory University, Atlanta, GA, USA

14   <sup>2</sup>Center for Childhood Infections and Vaccines of Children's Healthcare of Atlanta, Department of Pediatrics, Emory  
15   University School of Medicine, Atlanta, GA, USA

16   <sup>3</sup>Division of Infectious diseases, Emory University School of Medicine, Atlanta, Georgia, USA.

17   <sup>4</sup>Emory Vaccine Center, Emory University, Atlanta, GA, USA

18   <sup>5</sup>Yerkes National Primate Research Center, Atlanta, GA, USA

19   <sup>6</sup>Emory-UGA Center of Excellence of Influenza Research and Surveillance (CEIRS), Atlanta GA, USA

20  
21  
22  
23  
24  
25  
26  
27   \*Correspondence:   Mehul   S.   Suthar   (mehul.s.suthar@emory.edu)   and   Luisa   Cervantes-Barragan  
28   Lcervantes@emory.edu

29   Lead contact: Mehul S. Suthar (mehul.s.suthar@emory.edu)

30

31 **Abstract**

32 Infection with SARS-CoV-2 has caused a pandemic of unprecedented dimensions. SARS-CoV-2  
33 infects airway and lung cells causing viral pneumonia. The importance of type I interferon (IFN)  
34 production for the control of SARS-CoV-2 infection is highlighted by the increased severity of  
35 COVID-19 in patients with inborn errors of type I IFN response or auto-antibodies against IFN- $\alpha$ .  
36 Plasmacytoid dendritic cells (pDCs) are a unique immune cell population specialized in  
37 recognizing and controlling viral infections through the production of high concentrations of type I  
38 IFN. In this study, we isolated pDCs from healthy donors and showed that pDCs are able to  
39 recognize SARS-CoV-2 and rapidly produce large amounts of type I IFN. Sensing of SARS-CoV-  
40 2 by pDCs was independent of viral replication since pDCs were also able to recognize UV-  
41 inactivated SARS-CoV-2 and produce type I IFN. Transcriptional profiling of SARS-CoV-2 and  
42 UV-SARS-CoV-2 stimulated pDCs also showed a rapid type I and III IFN response as well as  
43 induction of several chemokines, and the induction of apoptosis in pDCs. Moreover, we modeled  
44 SARS-CoV-2 infection in the lung using primary human airway epithelial cells (pHAEs) and  
45 showed that co-culture of pDCs with SARS-CoV-2 infected pHAEs induces an antiviral response  
46 and upregulation of antigen presentation in pHAE cells. Importantly, the presence of pDCs in the  
47 co-culture results in control of SARS-CoV-2 replication in pHAEs. Our study identifies pDCs as  
48 one of the key cells that can recognize SARS-CoV-2 infection, produce type I and III IFN and  
49 control viral replication in infected cells.

50

51

## 52 **Importance**

53 Type I interferons (IFNs) are a major part of the innate immune defense against viral  
54 infections. The importance of type I interferon (IFN) production for the control of SARS-CoV-2  
55 infection is highlighted by the increased severity of COVID-19 in patients with defects in the type  
56 I IFN response. Interestingly, many cells are not able to produce type I IFN after being infected  
57 with SARS-CoV-2 and cannot control viral infection. In this study we show that plasmacytoid  
58 dendritic cells are able to recognize SARS-CoV-2 and produce type I IFN, and that pDCs are able  
59 to help control viral infection in SARS-CoV-2 infected airway epithelial cells.

## 60 **Introduction**

61 Infection with SARS-CoV-2 in humans has caused a pandemic of unprecedented dimensions. In  
62 the United States, more than 31 million people have tested positive for infection and more than  
63 550,000 have died as of April 2021. SARS-CoV-2 infects airway epithelial cells and Type 2  
64 pneumocytes causing fever, dry cough, and shortness of breath. While most patients experience  
65 mild to moderate disease, some progress to more severe disease, including pneumonia and acute  
66 respiratory failure. Severe cases of COVID-19 can result in lung damage, low blood oxygen levels,  
67 and death<sup>1,2</sup>.

68

69 Type I and III IFNs are a major part of the innate immune defense against viral infections<sup>3</sup>. One  
70 characteristic of coronavirus infections including SARS-CoV-2 is the low induction of type I IFN in  
71 the host<sup>4-6</sup>. The reduced type I IFN production from infected cells is caused by both lack of  
72 recognition of the viral RNA by pathogen recognition receptors, and the IFN antagonist function  
73 of several viral non-structural proteins (nsp; as reviewed in<sup>7,8</sup>). Early reports detected low levels  
74 of type I IFN in the blood of COVID-19 patients<sup>4</sup>. However, transcriptional analysis of  
75 bronchoalveolar lavage (BAL) or peripheral blood of COVID-19 patients detected an early type I  
76 IFN signature<sup>9-11</sup>. The importance of type I IFN production for the control of SARS-CoV-2 infection  
77 is highlighted by the increased severity of COVID-19 in patients with inborn errors of type I IFN  
78 response, as well as patients presenting with auto-antibodies against IFN- $\alpha$ <sup>12,13</sup>. Moreover, IFN-  
79 2 $\alpha$  treatment of COVID-19 patients with inborn errors of type I IFN response, as well as early  
80 administration of IFN- $\alpha$ 2 to COVID-19 patients reduced in hospital mortality<sup>14,15</sup>.

81

82 Plasmacytoid dendritic cells (pDCs) are a unique immune cell population specialized in  
83 recognizing and controlling viral infections through the production of high concentrations of type I

84 IFN<sup>16,17</sup>. pDCs have unique features that enable their unparalleled antiviral response. They  
85 express pattern recognition receptors like TLR7 or TLR9<sup>18</sup>, which allow pDCs to sense viral RNA  
86 or DNA even in the absence of viral infection or replication<sup>19</sup>. They constitutively express IRF-7,  
87 the master transcription factor for interferon (IFN)- $\alpha$ , which enables rapid production and secretion  
88 of IFN- $\alpha$ <sup>16,17</sup>. Both human and murine pDCs can sense SARS-CoV and the murine coronavirus  
89 MHV-A59 respectively. pDCs can sense these coronaviruses through TLR7 and produce high  
90 concentrations of IFN- $\alpha$ <sup>20,21</sup>. pDCs numbers are reduced in the blood of COVID-19 patients<sup>9</sup>.  
91 However, increased numbers of pDCs are found in the BAL of mild COVID-19 patients in contrast  
92 to severe COVID-19 patients which have reduced numbers of pDCs in BAL<sup>10</sup>. Network analyses  
93 of single-cells RNA seq of COVID-19 patients showed an association between apoptosis in pDCs  
94 and disease severity<sup>22</sup>. Despite these findings, we still lack studies that address the contribution  
95 of pDCs to SARS-CoV-2 control in the airways.

96

97 Primary human airway epithelial cell cultures are permissive to SARS-CoV-2 infection, and have  
98 been used for both short and long term modelling of infection. Ciliated cells and goblet cells are  
99 permissive to infection while SARS-CoV-2 has not been detected on basal and club cells<sup>23</sup>. Our  
100 previous studies have shown that human airway epithelial cell cultures (pHAE) are unable to  
101 produce a type I or III IFN response after infection with SARS-CoV-2<sup>24</sup>. Similarly, Lieberman et al  
102 observed no induction of interferon stimulated genes (ISGs) after 3 days of SARS-CoV-2 infection  
103 in pHAEs<sup>25</sup>. A delayed type I IFN response is observed in pHAEs after 7 days of infection and  
104 positively correlates with the levels of replication of SARS-CoV-2<sup>26</sup>, which is recognized by pHAE  
105 cells through MDA-5<sup>27</sup>. Importantly, in contrast to SARS-CoV, SARS-CoV-2 is susceptible to type  
106 I and III IFN inhibition<sup>28,29</sup>. Pre- or post-treatment of pHAEs with IFN- $\beta$  or IFN- $\lambda$  was able to reduce  
107 SARS-CoV-2 replication, suggesting that if an IFN response can be elicited, it is effective in  
108 controlling SARS-CoV-2 infection<sup>24</sup>.

109 In this study, we tested the ability of pDCs to sense SARS-CoV-2. pDCs isolated from healthy  
110 donors recognized SARS-CoV-2 and rapidly produced large concentrations of IFN- $\alpha$ . Sensing of  
111 SARS-CoV-2 by pDCs was independent of viral replication. We observed that pDCs can  
112 recognize UV-inactivated SARS-CoV-2 and produce type I IFN with similar kinetics.  
113 Transcriptional profiling of SARS-CoV-2 and UV-SARS-CoV-2 showed a swift type I and III IFN  
114 signature after 12h stimulation. Moreover, we observed the induction of several chemokines, pro-  
115 inflammatory cytokines and the induction of apoptosis in pDCs. To test if type I IFN production by  
116 pDCs was able to control viral replication we modeled SARS-CoV-2 infection in the lung using  
117 primary human airway epithelial cells (pHAEs) and showed that co-culture of pDCs with SARS-  
118 CoV-2 infected pHAEs induces an antiviral response and upregulation of antigen presentation in  
119 pHAE cells. Importantly, the presence of pDCs in the co-culture results in control of SARS-CoV-  
120 2 replication in pHAEs. Overall, our study identifies pDCs as a key cells that recognize SARS-  
121 CoV-2 infection and produce type I and III IFN that can control viral replication in airway cells.

## 122 **Materials and Methods**

123 **Viruses and cells.** The infectious clone SARS-CoV-2 (icSARS-CoV-2) was kindly provided to  
124 us by Dr. Vineet Menachery (UTMB)<sup>30</sup>. Viral titers were determined by plaque assay or focus-  
125 forming assay on VeroE6 cells (ATCC). VeroE6 cells were cultured in complete DMEM medium  
126 consisting of 1x DMEM (Corning Cellgro), 10% FBS, 25 mM HEPES Buffer (Corning Cellgro), 2  
127 mM L-glutamine, 1mM sodium pyruvate, 1x Non-essential Amino Acids, and 1x antibiotics. Viral  
128 stocks were titered on VeroE6 cells and stored at -80°C until use.

129  
130 **Plasmacytoid dendritic cell isolation.** Deidentified human blood from healthy individuals was  
131 collected with the approval of the Internal Review Board (IRB) of Emory University number  
132 IRB00045821. PBMCs were obtained by Ficoll-Hypaque density gradient centrifugation. pDCs  
133 were further purified by magnetic sorting with human Diamond Plasmacytoid dendritic-cell  
134 isolation kit II (Miltenyi Biotec). Purity of cell preparation was assessed by flow cytometry and for  
135 all donors was more than 90%.

136  
137 **Plasmacytoid dendritic cell stimulation.**  $4 \times 10^4$  pDCs were infected with SARS-CoV-2 (MOI=1)  
138 or stimulated with medium, UV inactivated SARS-CoV-2 (MOI=1) or CpG A (6ug/ml). After one-  
139 hour medium was replaced and cells were incubated at 37°C. After 12hr cell were collected and  
140 frozen for RNA isolation and after 24h supernatants were collected and frozen for ELISA  
141 measurements.

142  
143 **Generation of primary human airway epithelial cells.** pHAE cultures were generously provided  
144 by Dr. C. U. Cotton (Case Western Reserve University) and cultured as described previously<sup>31</sup>.  
145 Briefly, bronchial lung specimens were seeded on Transwell Permeable Support Inserts (Costar-

146 Corning) and cultured until confluent. Specimens were then transferred to an air/liquid interface  
147 and differentiated for 2-3 weeks. Cultures were maintained in DMEM/Ham's F-12 medium  
148 supplemented with 2% Ultrosor G (Pall Corp., France), until all wells had TEER measurements  
149 greater than 1000  $\Omega$  and deemed ready for use.

150

151 **Co-culture of HAE and pDC cells.** pDCs were isolated as described above, then stimulated for  
152 3 hours in complete RPMI supplemented with; medium, CpG A (ODN2216 at 6 $\mu$ g/ml), UV  
153 inactivated SARS-CoV-2 (MOI=1) at 37°C. During the 3 hour stimulation, differentiated pHAE  
154 cultures were infected; the apical side of the pHAE culture was washed 3 times with PBS, then  
155 SARS-CoV-2 (MOI=1) was allowed to adsorb for 1 hour at 37°C. After adsorption, the apical side  
156 was washed 3 times with PBS to remove excess virus. The basolateral media was then replaced  
157 with fresh media containing the stimulated pDCs, medium only, or IFN $\beta$  (100 IU/mL). Cells were  
158 co-cultured for up to 72 hours, with no disturbance of the basolateral media. To collect viral  
159 supernatant, PBS was added to the apical side and incubated for 30 minutes at 37°C.

160

161 **Focus-forming Assays.** To measure SARS-CoV-2 viral burden, supernatant from infected cells  
162 was serially diluted (10-fold dilutions) in serum free RPMI. Virus dilutions were overlaid on VeroE6  
163 cells and incubated with a methylcellulose overlay (0.85% methylcellulose in 2X DMEM) for 48  
164 hours at 37°C. Methylcellulose was removed, cells were then fixed with 2%-PFA and  
165 permeabilized with 0.1% bovine serum albumin (BSA)-Saponin in PBS. Permeabilized cell  
166 monolayers were incubated with an anti-SARS-CoV-2 spike protein primary antibody (provided  
167 by Jens Wrarmert, Emory University) conjugated to biotin for 2 hours at room temperature (RT),  
168 then washed 3 times. Cells were incubated with an avidin-HRP conjugated secondary antibody



169 for 1 hour at RT. Foci were visualized using True Blue HRP substrate and imaged on an ELI-  
170 SPOT reader (CTL Analyzers)<sup>24</sup>.

171  
172 **IFN- $\alpha$  ELISA.** Human IFN- $\alpha$  concentration in cell-culture supernatants was measured by  
173 enzyme-linked immunosorbent assay (ELISA; PBL Biomedical Laboratories, Piscataway, NJ)  
174 according to the manufacturer's instructions.

175  
176 **Quantitative PCR analysis.** pHAE cultures were lysed by adding RNA lysis buffer directly to the  
177 apical layer for >5 minutes, then lysate was collected in Eppendorf tubes. RNA was extracted  
178 using the Zymo Quick-RNA MiniPrep kit (VWR, R1055) according to the manufacturers protocol,  
179 then reverse transcribed into cDNA using a high-capacity cDNA reverse transcription kit (Thermo  
180 Fisher, 43-688-13). RNA levels were quantified using the IDT Prime Time Gene Expression  
181 Master Mix, and Taqman gene expression Primer/Probe sets. All qPCR was performed in 384-  
182 well plates and run on a QuantStudio5 qPCR system. Viral RNA was quantified using SARS-CoV-  
183 2 Rdrp specific primers and probes as described in Vanderheiden et al. The following Taqman  
184 Primer/ Probe sets were used in this analysis: Gapdh (Hs02758991\_g1), IFIT2 (Hs01922738\_s1),  
185 IFIH1 (Hs00223420\_m1). C<sub>T</sub> values were normalized to the reference gene GAPDH and  
186 represented as fold change over mock.

187  
188 **RNA-Sequencing** pDCs were centrifuged and lysis buffer was added to the pellet. RNA was  
189 extracted using the RNAeasy microkit (Qiagen) following manufacturer's instructions. RNA from  
190 pHAE cells was extracted as described above, and mRNA sequencing libraries were prepared by  
191 the Yerkes Genomics Core using the Clontech SMART-Seq v4 kit. Barcoding and sequencing  
192 primers were added using a NexteraXT library kit, and validated by microelectrophoresis.

193 Libraries were sequenced on an Illumina NovaSeq 6000 and mapped to the human reference  
194 genome 38 using DNASTAR software. Viral genes were mapped to the FDAARGOS\_983 strain  
195 of the 2019-nCoV/USA-WA1/2020 SARS-CoV-2 isolate. Reads were normalized and differentially  
196 expressed genes were analyzed using DESeq2 (Bioconductor). Gene set enrichment analysis  
197 was performed using the software provide by the Broad Institute and the MSigDB database. The  
198 raw data of all RNA sequencing will be deposited into the Gene Expression Omnibus (GEO)  
199 repository and the accession number will be available following acceptance of this manuscript.

200

201 **Statistical analysis.** Statistical analyses were performed using GraphPad Prism 8, ggplot2 R  
202 package, and GSEA software. Statistical significance was determined as P value of 0.05 using  
203 Student's t test or a one-way analysis of variance (ANOVA). All comparisons were made between  
204 treatment or infection conditions with time point-matched, uninfected and untreated controls.

205 **Results**

206 **Plasmacytoid Dendritic cells (pDCs) recognize SARS-CoV-2 and produce type I IFN.** pDCs  
207 are uniquely poised to respond to pathogen infection and produce large amounts of type I IFNs.  
208 However, the role of pDCs in responding to SARS-CoV-2 is not well understood. To investigate  
209 this, pDCs were isolated from blood of healthy donors and infected with SARS-CoV-2. CpG A  
210 (ODN2216 at 6 $\mu$ g/ml) was used as control. Following SARS-CoV-2 infection, pDCs produced over  
211 3500 pg/ml of IFN- $\alpha$  as early as 24 hours post-infection (**Figure 1A**). To determine if virus  
212 replication is required for pDCs to respond to SARS-CoV-2, we stimulated pDCs with either live  
213 SARS-CoV-2 or UV inactivated SARS-CoV-2 (UV-SARS-CoV-2) at equivalent MOIs and  
214 measured IFN- $\alpha$  production. pDCs maintained IFN- $\alpha$  production after stimulation with UV-SARS-  
215 CoV-2 as compared to live SARS-CoV-2, demonstrating that virus replication is not required by  
216 pDCs for sensing SARS-CoV-2 and to produce type I IFN.

217

218 **Transcriptional profile of SARS-CoV-2 stimulated pDCs shows type I and type III IFN and**  
219 **apoptosis signature.** Besides their ability to produce type I IFN, pDCs are able to produce  
220 several proinflammatory cytokines and chemokines as well as type III IFN<sup>17</sup>. To determine the  
221 response of pDCs to SARS-CoV-2, and identify if there are different expression patterns when  
222 pDCs are stimulated with SARS-CoV-2 vs. UV-SARS-CoV-2 or CpG, pDCs were stimulated with  
223 SARS-CoV-2, UV-SARS-CoV-2 and CpG, RNA was isolated 12h post stimulation and bulk  
224 RNAseq performed. pDCs stimulated with either SARS-CoV-2 or UV-SARS-CoV-2 expressed  
225 high levels of IFN- $\beta$ , IFN- $\alpha$  as well as type III IFN: IFN- $\lambda$ 1 and IFN- $\lambda$ 3 and IFN- $\omega$ . SARS-CoV-2  
226 and UV-SARS-CoV-2 stimulated pDCs also highly expressed several chemokines such as  
227 CXCL10 (IP-10) and CXCL11 (IP-9) CCL7 (MCP3), CCL8 (MCP2), CCL2 (MCP-1) which recruit  
228 monocytes and T cells to sites of inflammation, as well as promote T cell adhesion<sup>32</sup>. Finally,  
229 pDCs also upregulated IDO expression which has been associated with pDC-dependent induction

230 of T regulatory cells (Tregs)<sup>33,34</sup> (**Figure 2A-C**). When comparing stimulation of pDCs with SARS-  
231 CoV-2 to pDCs stimulated with either UV-SARS-CoV-2 or CpG A we confirmed that the type I  
232 and III IFN gene expression was similar in all three groups (**Figure 2C and D**). However, there  
233 were some DEGs were present only each of the conditions, Interestingly, we also observed an  
234 increase in the apoptosis signature in SARS-CoV-2 activated pDCs when compared to medium  
235 stimulated pDCs suggesting pDCs may die after activation with SARS-CoV-2 and type I and III  
236 IFN production (**Figure 2E**). These results confirm that viral replication is not needed for a high  
237 production of type I and type III IFN by pDCs after sensing SARS-CoV-2 infection, and that  
238 stimulation with SARS-CoV-2 may increase the apoptosis signature in pDCs.

239

#### 240 **pDCs protect primary human airway epithelial (pHAE) cells from SARS-CoV-2 infection.**

241 Since pDCs are able to produce type I and III IFN after SARS-CoV-2 stimulation, we next  
242 investigated if pDC-derived-IFN is able to control SARS-CoV-2 replication and protect lung  
243 epithelial cells. To test this, we utilized pHAE cells isolated from the bronchial or tracheal  
244 region of healthy donors. These cells are cultured in an air-liquid interface to create a  
245 polarized, pseudostratified epithelial layer that models the critical features of the human  
246 respiratory tract, such as cilium movement and mucus production<sup>31</sup>. We have previously  
247 shown that pHAE cells are susceptible to SARS-CoV-2 infection, and respond by producing  
248 a variety of inflammatory cytokines<sup>35</sup>. However, SARS-CoV-2 infection does not induce the  
249 production of type I or type III IFN by pHAE cells. To test if pDCs are able to control viral  
250 infection in pHAE cells, we developed a co-culture system. pHAE cells were infected with  
251 SARS-CoV-2 at MOI=1 for 1 hour. In parallel, pDCs were stimulated with UV-SARS-CoV-2,  
252 CpG A, or left untreated. After 3 hours, pDCs were washed and placed in the bottom well of  
253 the SARS-CoV-2 infected-pHAE transwell culture (**Figure 3A**). Addition of recombinant IFN-

254  $\beta$ , UV-SARS-CoV-2 and CpG A to the bottom wells in the absence of pDCs was used as  
255 control. UV-SARS-CoV-2 stimulated pDCs and CpG stimulated pDCs were able to strongly  
256 reduce replication and virus production of SARS-CoV-2 in pHAE cells. Co-culture with  
257 stimulated pDCs reduced infectious SARS-CoV-2 production (as measured by focus-forming  
258 assay) from the apical surface of pHAE cells by 1000-fold, as well as viral RNA (100-fold  
259 reduction) at 72h post infection (**Figure 3B and C**). Importantly, the protective effect was  
260 mediated by pDCs, since addition of CpG or UV-SARS-CoV-2 alone to the basolateral side  
261 didn't reduce viral replication. Interestingly, unstimulated pDCs were also able to reduce the  
262 viral load, suggesting that infected pHAE cells are able to activate a type I IFN response in  
263 pDCs that is rapid enough to decrease viral replication within 72 hours (**Figure 3B and C**).  
264 As seen in our previous study, addition of IFN- $\beta$  to the bottom well reduced viral replication,  
265 confirming its protective effect against SARS-CoV-2 and suggesting pDCs act through type I  
266 IFN production. Indeed, when we analyzed the transcriptional profile of infected pHAEs co-  
267 cultured with pDCs we observed the upregulation of several interferon-stimulated genes  
268 (ISGs) such as IFIH1 and IFIT2 (**Figure 3D**).

269

270 **Activated pDCs induce an antiviral profile in SARS-CoV-2 pHAE infected cells.** We next  
271 evaluated how the presence of activated pDCs changes the transcriptional profile of SARS-  
272 CoV-2 infected pHAE cells. To this end, we performed mRNAseq analysis of pHAE cells  
273 infected with SARS-CoV-2 and co-cultured with pDCs, UV-SARS-CoV-2 activated pDCs, and  
274 IFN- $\beta$  or media as controls. First, analysis at 72 hrs post infection showed a reduction in viral  
275 read counts spanning the whole viral genome when infected pHAEs cells were co-cultured  
276 with activated pDCs. Interestingly, co-culture with activated pDCs was more efficient than

277 addition of IFN- $\beta$  in reducing viral RNAs, which is likely due to the concerted action of type I  
278 IFN (IFN- $\beta$  and IFN- $\alpha$ ) and type III IFN (IFN- $\lambda$ ) produced by pDCs (Figure 4A).

279 To determine if the presence of activated pDCs in the co-culture changed the response of  
280 pHAE cells to infection, we plotted fold-change over mock for each co-culture condition (IFN-  
281  $\beta$  treatment, pDC alone, UV-Cov-2+pDC) to the untreated infected control. Investigation of  
282 the differentially expressed genes (DEGs; cutoffs:  $p < 0.01$  fold change  $< > 2$ ) in infected pHAE  
283 cells treated with IFN- $\beta$  treated cells or untreated identified that many DEGs were expressed  
284 in both conditions (112, yellow), but IFN- $\beta$  treatment induced 242 uniquely expressed genes  
285 (green) while untreated cells only had 12 unique DEGs (red) (**Figure 4B**). Comparison of  
286 untreated pHAEs with pDC co-cultured pHAEs resulted in similar numbers of DEGs  
287 expressed by both or only untreated cells, however pDC co-cultured cells had 448 (green)  
288 unique DEGs. Co-culture with UV-CoV-2 stimulated pDCs resulted in the exact same number  
289 of DEGs expressed in both or only untreated cells, however there were three times more  
290 (1518 genes) genes uniquely expressed in co-cultured pHAEs when the pDCs were  
291 stimulated with UV-CoV-2 as compared to unstimulated pDCs (**Figure 4B**). This analysis  
292 determined that 1,518 genes were differentially expressed only if pHAEs cells were co-  
293 cultured with activated pDCs (**Figure 4B**). These results suggest that the presence of  
294 activated pDCs profoundly change the response of pHAEs to infection.

295

296 We next investigated the identity of the unique DEGs induced by co-culture of infected pHAE  
297 cells with pDCs. As expected, IFN- $\beta$  induced expression of key signaling molecules and  
298 transcription factors in the type I IFN pathway such as STAT1 and IRF7. However, co-culture  
299 of pHAE cells with unstimulated pDCs or UV-CoV-2-stimulated pDCs had an even greater  
300 upregulation of STAT1 and IRF7 (**Figure 4C**). Accordingly, heatmap analysis identified an

301 upregulation of many ISGs (IFIT2, RSAD2, ISG20) in IFN- $\beta$  treated, pDC or UV-CoV-2-pDC  
302 co-cultured pHAE cells, with not only higher magnitude but also greater breadth of ISG  
303 expression in the pDC co-cultured cells (**Figure 4D**). We also analyzed if pDC co-culture  
304 affected the inflammatory response induced in pHAE by SARS-CoV2 infection. As seen in  
305 figure 4D, co-culture with pDCs increased the inflammatory response of infected pHAE cells.  
306 Additionally, co-culture with UV-CoV-2-pDC upregulated the expression of 10 key  
307 inflammatory response genes, such as cytokine receptors IL12RB1, IL15RA, CSF3R, that  
308 was not observed in untreated, or IFN $\beta$  treated pHAE cells. Interestingly, co-culture with pDCs  
309 also induced the expression of molecules of the antigen presentation pathway. This may be  
310 of particular importance during the initial phases of infection in order harness the adaptive  
311 immune response to SARS-CoV-2.

312

## 313 Discussion

314 In this study, we show that pDCs are able to recognize SARS-CoV-2 infection and produce  
315 high levels of type I IFN. Activated pDCs are able to control SARS-CoV-2 infection in pHAE  
316 cells by inducing an interferon response and an antiviral transcriptional program. SARS-CoV-  
317 2 and other coronaviruses are able to avoid recognition and type I IFN induction in several  
318 cell populations including airway epithelial cells. However, pDCs are able to sense SARS-  
319 CoV-2 and produce large amounts of type I and type III interferons. One major difference  
320 between pDCs and other cells is their expression of TLRs such as TLR7 which allows them  
321 to sense ssRNA<sup>17</sup>. Indeed, when we stimulated pDCs with UV-inactivated SARS-CoV-2  
322 similar to live SARS-CoV-2, they produced IFN- $\alpha$ , suggesting that pDCs do not require active  
323 infection to sense the presence of SARS-CoV-2. A recent report has also shown that pDCs  
324 can get activated and upregulate CD80, CD86, CCR7 and OX40 after stimulation with SARS-  
325 CoV-2 independently of viral replication<sup>36</sup>. This gives pDCs two unique advantages for viral  
326 sensing: they are able to rapidly recognize the presence of viral RNA even before viral  
327 replication would start, without being susceptible to infection. Moreover, if pDCs don't support  
328 productive SARS-CoV-2 replication, they may not be susceptible to the IFN antagonist effects  
329 of several SARS-CoV-2 nonstructural proteins.

330

331 We used human pHAE cell cultures to model the epithelial cell layer of the respiratory tract.  
332 pHAEs are susceptible to SARS-CoV-2 infection and recapitulate several features of  
333 respiratory disease, including inflammatory cytokine release and enrichment of ER stress  
334 pathways<sup>24</sup>. Co-culture of SARS-CoV-2 infected pHAEs together with pDCs that have been  
335 stimulated with UV-SARS-CoV-2 resulted in inhibition of viral particle production as seen by  
336 the reduction of viral titers in focus-forming assays (FFA) of the apical side of the pHAEs and



337 inhibition of viral replication as seen in the reduction of viral RNA in the cells. Interestingly,  
338 co-culture of unstimulated pDCs with infected pHAE cells also resulted in reduced viral titers.  
339 We have previously demonstrated that viral particles are only released to the apical side of  
340 the pHAE culture<sup>24</sup>. Moreover, we confirmed the absence of infectious virus in the basolateral  
341 medium, where pDCs were located, by FFA. Nevertheless, pDCs were able to sense the  
342 infection of pHAE cells. Future studies will be needed to investigate if pDCs recognize viral  
343 RNA or soluble mediators from infected pHAE cells in the basolateral side.

344

345 The transcriptional analysis of SARS-CoV-2 infected pHAE cells corroborated that they are  
346 unable to produce type I IFN, although they can produce several inflammatory cytokines<sup>24</sup>.  
347 However, when infected pHAEs were co-cultured with activated pDCs, a set of 1510  
348 additional genes were upregulated when compared to infected pHAEs that were not co-  
349 cultured with pDCs, revealing the strong impact of the presence of pDCs in pHAE cell  
350 response to viral infection. Several of these uniquely upregulated genes are ISGs or have  
351 been shown to have an antiviral role in the control of coronavirus infections, for example OAS  
352 or IFIT. Interestingly, the expression in pHAEs of genes upregulated by inflammatory  
353 cytokines increased by the presence of pDCs, suggesting that pDC production of  
354 inflammatory cytokines enhances the inflammatory response of pHAEs. We also observed  
355 the upregulation of genes involved in the antigen presentation pathway, which were not  
356 upregulated in the infected pHAE cells without pDCs. A key role of type I IFN signaling is the  
357 upregulation of class I antigen presentation to allow cytotoxic T cells to recognize viral  
358 infected cells and eliminate them. This is an additional mechanism by which pDC-derived IFN  
359 may contribute to viral control and induction of the adaptive immune response.

360

361 Since pDCs are able to sense SARS-CoV-2 infection and reduce viral replication, the  
362 remaining question is, how can SARS-CoV-2 overcome pDC recognition to establish  
363 infection. Previous studies have demonstrated that the frequency of pDCs in the blood of  
364 hospitalized Covid-19 patients is much lower than the frequencies in healthy donors<sup>9</sup>. This  
365 may be the result of three different mechanisms: pDCs may be activated very early on during  
366 infection, and in individuals where infection is more severe we observe the loss of the  
367 previously activated pDCs. A study by Swiecki et al. showed that pDCs die by apoptosis after  
368 viral recognition and IFN- $\alpha$  production<sup>37</sup>. Consistently, we observed an increase in the  
369 apoptosis signature in SARS-CoV-2 stimulated pDCs. Moreover, it has been also shown that  
370 during prolonged or chronic viral infections, pDCs present an exhausted phenotype and stop  
371 producing type I IFN<sup>38,39</sup>. Another possibility is that SARS-CoV-2 viral proteins directly target  
372 pDCs *in vivo* and result in their depletion. Network analyses of single-cells RNA seq of COVID-  
373 19 patients showed an association between apoptosis in pDCs and disease severity<sup>22</sup>. Finally, it  
374 is also possible that pDCs are largely recruited to the infected tissues such as lungs and this  
375 results in reduced frequencies in peripheral blood. Indeed, numbers of pDCs are found in the  
376 BAL of mild COVID-19 patients in contrast to severe COVID-19 patients which have reduced  
377 numbers of pDCs in BAL<sup>10</sup>. Future studies in animal models, where the initial hours after  
378 infection can be studied will be very helpful in elucidating the fate of pDCs and why they are  
379 reduced in COVID-19 patients. Recently, a study in which Covid-19 patients were treated with  
380 IFN showed that early interferon treatment associates with favorable clinical response in  
381 COVID-19 patients<sup>15</sup>. Here we showed that co-culture of pDCs with infected pHAEs was  
382 better at controlling SARS-CoV-2 infection than pre-treatment of pHAEs with IFN- $\beta$ ,  
383 suggesting a potential use of pDC activation as treatment for COVID-19. Since pDCs are  
384 able to produce not only IFN- $\beta$ , but IFN- $\alpha$ , and IFN- $\lambda$ , rescuing pDC numbers or activating

385 the remaining pDCs in COVID-19 patients is an attractive strategy to reduce the severity of  
386 the disease.

387

388 **Figure legends**

389 **Figure 1. Plasmacytoid dendritic cells (pDCs) recognize SARS-CoV-2 and produce IFN-**

390  **$\alpha$ .** A) human pDCs were mock infected (media), infected with SARS-CoV-2 (MOI=1) or  
391 stimulated with CpG A (6 $\mu$ g/ml) for 24 or 48 hr. B) human pDCs were stimulated with medium,  
392 SARS-CoV-2, UV inactivated SARS-CoV-2 or CpG A for 24h. At the indicated timepoints  
393 supernatants were collected and IFN- $\alpha$  was measured by ELISA. Dots represent pDCs from  
394 single donors, bars depict means. Graphs are representative of 3 independent experiments.  
395 Data was analyzed using one-way ANOVA \*\*\*, P<0.001.

396

397 **Figure 2. pDC transcriptional profile shows a type I and type II IFN signature after**

398 **SARS-CoV-2 stimulation.** Human pDCs were infected with SARS-CoV-2 (MOI=1) or  
399 stimulated with UV-SARS-CoV-2 (MOI=1), CpG A (6 $\mu$ g/ml) or medium. After 12h cells were  
400 collected for bulk-RNA-Seq analysis. A) Volcano plot showing all differentially regulated  
401 genes (DEG) between media and SARS-CoV-2 infected pDCs in red and blue. B) GSEA plot  
402 showing enrichment in interferon-alpha-response genes after SARS-CoV-2 activation in  
403 pDCs. C) Heatmap illustrating the z-scores for the 30 most differentially upregulated genes  
404 in SARS-CoV-2 infected pDCs. D) Fold-change vs fold-change plot of SARS-CoV-2 vs  
405 medium and UV-SARS-CoV-2 vs medium showing in green the DEG in SARS-CoV-2  
406 only, in red the DEG in SARS-CoV-2 only and in orange the DEG in both conditions and  
407 change vs fold-change plot of SARS-CoV-2 vs medium and CpG A vs medium showing in  
408 green the DEG in CpG only, in red the DEG in SARS-CoV-2 only and in orange the DEG in  
409 both conditions. E) GSEA plot showing enrichment in Apoptosis genes in medium vs SARS-  
410 CoV-2 stimulated pDCs.

411 **Figure 3. pDCs reduce SARS-CoV-2 replication in pHAE cultures.** A) Experimental  
412 schematic. B) pDCs were stimulated for 3 hours in complete RPMI supplemented with; medium,  
413 CpG A (ODN2216 at 6 $\mu$ g/ml), or UV inactivated SARS-CoV-2 (MOI=1) at 37°C. In parallel,  
414 differentiated pHAE cultures were infected with SARS-CoV-2 (MOI=1). After 3 hours the  
415 basolateral media was replaced with fresh media containing the stimulated pDCs, medium only,  
416 or IFN $\beta$  (100 IU/mL). After 72 hours, the apical side was washed and supernatant was collected  
417 and pHAE cells were harvested and RNA extracted. B) Viral titers in the apical side, C) Total viral  
418 RNA in the cells and D) IFIH1 and IFIT2 expression in pHAEs in the different conditions tested.  
419 Dots represent single replicates and bars represent the means. Data was analyzed using one-  
420 way ANOVA. \*, P<0.05; \*\*, P<0.01; \*\*\*, P<0.001.

421

422 **Figure 4. pDCs induce an interferon signature in pHAE cells.** Bulk RNA-seq analysis was  
423 performed in pHAE cells from the co-culture experiment described in figure 3. A) Normalized read  
424 counts (log<sub>2</sub>) of SARS-CoV-2 RNA products, using the MT246667.1 reference sequence. B)  
425 Fold-change vs fold-change plot of SARS-CoV-2 infected pHAE cells vs uninfected pHAE  
426 cells and SARS-CoV-2 infected pHAE cells treated with IFN- $\beta$  vs uninfected pHAE cells. Fold-  
427 change vs fold-change plot of SARS-CoV-2 infected pHAE cells vs uninfected pHAE cells  
428 and SARS-CoV-2 infected pHAE cells co-cultured with UV-SARS-CoV-2 treated pDCs vs  
429 uninfected pHAE and fold-change vs fold-change plot of SARS-CoV-2 infected pHAE cells vs  
430 uninfected pHAE cells and SARS-CoV-2 infected pHAE cells co-cultured with pDCs vs  
431 uninfected pHAE cells. Dots highlighted in green, red and orange are the DEG in each  
432 condition. C) Normalized read counts (log<sub>2</sub>) of expression of STAT1 and IRF7 in pHAE cells  
433 treated in the indicated conditions. D) Heatmap illustrating the z-scores for genes associated  
434 to the interferon response, inflammatory response and antigen presentation. Dots represent

435 single replicates and bars represent the means. Data was analyzed using one-way ANOVA. \*,  
436  $P < 0.05$ ; \*\*,  $P < 0.01$ ; \*\*\*,  $P < 0.001$ .

437

438

439

440

441

442 **Funding:** This work was supported in part by grants (HHSN272201400004C (M.S.S.), U19  
443 AI090023 (M.S.S.), P51 OD011132 and R56 AI147623 (to Emory University) from the National  
444 Institute of Allergy and Infectious Diseases, National Institutes of Health, COVID-Catalyst-  
445 I<sup>3</sup> Funds from the Woodruff Health Sciences Center and Emory School of Medicine made possible  
446 through a grant from the O. Wayne Rollins Foundation, and through the Georgia CTSA NIH  
447 award **UL1-TR002378** (L.C-B and M.S.S.), the Emory Executive Vice President for Health  
448 Affairs Synergy Fund award, the Pediatric Research Alliance Center for Childhood Infections and  
449 Vaccines and Children's Healthcare of Atlanta, Center for Childhood Infections and Vaccines  
450 Special Coronavirus Pilot award, the Emory-UGA Center of Excellence for Influenza Research  
451 and Surveillance, and Woodruff Health Sciences Center 2020 COVID-19 CURE Award. The  
452 Yerkes NHP Genomics Core is supported in part by NIH P51 OD011132, and an equipment  
453 grant, NIH S10 OD026799. The funders had no role in study design, data collection and  
454 analysis, decision to publish, or preparation of the manuscript.

455

456 **Author contributions:**

457 L. C-B., and M.S. contributed to the acquisition, analysis, and interpretation of the data, as  
458 well as the conception and design of the study, and wrote the manuscript A.V. contributed  
459 to the acquisition, analysis, and interpretation of the data, and wrote the manuscript. C.J.R.,  
460 P.R, M.D-G., and T.C. contributed to the acquisition and analysis of the data, L.J.A. and  
461 A.G. contributed to the interpretation of the data.

462

463 **Declaration of interests:** The authors declare no competing interest

464 **References**

- 465 1 Zhou, P. *et al.* A pneumonia outbreak associated with a new coronavirus of probable bat  
466 origin. *Nature* **579**, 270-273, doi:10.1038/s41586-020-2012-7 (2020).
- 467 2 Zhu, N. *et al.* A Novel Coronavirus from Patients with Pneumonia in China, 2019. *N Engl*  
468 *J Med* **382**, 727-733, doi:10.1056/NEJMoa2001017 (2020).
- 469 3 Lazear, H. M., Schoggins, J. W. & Diamond, M. S. Shared and Distinct Functions of Type  
470 I and Type III Interferons. *Immunity* **50**, 907-923, doi:10.1016/j.immuni.2019.03.025  
471 (2019).
- 472 4 Blanco-Melo, D. *et al.* Imbalanced Host Response to SARS-CoV-2 Drives Development  
473 of COVID-19. *Cell* **181**, 1036-1045 e1039, doi:10.1016/j.cell.2020.04.026 (2020).
- 474 5 Kindler, E. & Thiel, V. SARS-CoV and IFN: Too Little, Too Late. *Cell Host Microbe* **19**,  
475 139-141, doi:10.1016/j.chom.2016.01.012 (2016).
- 476 6 Kindler, E., Thiel, V. & Weber, F. Interaction of SARS and MERS Coronaviruses with the  
477 Antiviral Interferon Response. *Adv Virus Res* **96**, 219-243,  
478 doi:10.1016/bs.aivir.2016.08.006 (2016).
- 479 7 Totura, A. L. & Baric, R. S. SARS coronavirus pathogenesis: host innate immune  
480 responses and viral antagonism of interferon. *Curr Opin Virol* **2**, 264-275,  
481 doi:10.1016/j.coviro.2012.04.004 (2012).
- 482 8 Kindler, E. & Thiel, V. To sense or not to sense viral RNA--essentials of coronavirus innate  
483 immune evasion. *Curr Opin Microbiol* **20**, 69-75, doi:10.1016/j.mib.2014.05.005 (2014).
- 484 9 Arunachalam, P. S. *et al.* Systems biological assessment of immunity to mild versus  
485 severe COVID-19 infection in humans. *Science* **369**, 1210-1220,  
486 doi:10.1126/science.abc6261 (2020).
- 487 10 Liao, M. *et al.* Single-cell landscape of bronchoalveolar immune cells in patients with  
488 COVID-19. *Nat Med* **26**, 842-844, doi:10.1038/s41591-020-0901-9 (2020).
- 489 11 Schulte-Schrepping, J. *et al.* Severe COVID-19 Is Marked by a Dysregulated Myeloid Cell  
490 Compartment. *Cell* **182**, 1419-1440 e1423, doi:10.1016/j.cell.2020.08.001 (2020).
- 491 12 Bastard, P. *et al.* Autoantibodies against type I IFNs in patients with life-threatening  
492 COVID-19. *Science* **370**, doi:10.1126/science.abd4585 (2020).
- 493 13 Zhang, Q. *et al.* Inborn errors of type I IFN immunity in patients with life-threatening  
494 COVID-19. *Science* **370**, doi:10.1126/science.abd4570 (2020).
- 495 14 Levy, R. *et al.* IFN- $\alpha$ 2a Therapy in Two Patients with Inborn Errors of TLR3 and IRF3  
496 Infected with SARS-CoV-2. *J Clin Immunol* **41**, 26-27, doi:10.1007/s10875-020-00933-0  
497 (2021).
- 498 15 Wang, N. *et al.* Retrospective Multicenter Cohort Study Shows Early Interferon Therapy  
499 Is Associated with Favorable Clinical Responses in COVID-19 Patients. *Cell Host Microbe*  
500 **28**, 455-464 e452, doi:10.1016/j.chom.2020.07.005 (2020).
- 501 16 Reizis, B. Plasmacytoid Dendritic Cells: Development, Regulation, and Function.  
502 *Immunity* **50**, 37-50, doi:10.1016/j.immuni.2018.12.027 (2019).



- 503 17 Swiecki, M. & Colonna, M. The multifaceted biology of plasmacytoid dendritic cells. *Nat*  
504 *Rev Immunol* **15**, 471-485, doi:10.1038/nri3865 (2015).
- 505 18 Kadowaki, N. *et al.* Subsets of human dendritic cell precursors express different toll-like  
506 receptors and respond to different microbial antigens. *J Exp Med* **194**, 863-869,  
507 doi:10.1084/jem.194.6.863 (2001).
- 508 19 Kumagai, Y. *et al.* Cutting Edge: TLR-Dependent viral recognition along with type I IFN  
509 positive feedback signaling masks the requirement of viral replication for IFN- $\alpha$   
510 production in plasmacytoid dendritic cells. *J Immunol* **182**, 3960-3964,  
511 doi:10.4049/jimmunol.0804315 (2009).
- 512 20 Cervantes-Barragan, L. *et al.* Control of coronavirus infection through plasmacytoid  
513 dendritic-cell-derived type I interferon. *Blood* **109**, 1131-1137, doi:10.1182/blood-2006-05-  
514 023770 (2007).
- 515 21 Cervantes-Barragan, L. *et al.* Plasmacytoid dendritic cells control T-cell response to  
516 chronic viral infection. *Proc Natl Acad Sci U S A* **109**, 3012-3017,  
517 doi:10.1073/pnas.1117359109 (2012).
- 518 22 Liu, C. *et al.* Time-resolved systems immunology reveals a late juncture linked to fatal  
519 COVID-19. *Cell* **184**, 1836-1857 e1822, doi:10.1016/j.cell.2021.02.018 (2021).
- 520 23 Hao, S. *et al.* Long-Term Modeling of SARS-CoV-2 Infection of In Vitro Cultured Polarized  
521 Human Airway Epithelium. *mBio* **11**, doi:10.1128/mBio.02852-20 (2020).
- 522 24 Vanderheiden, A. *et al.* Type I and Type III Interferons Restrict SARS-CoV-2 Infection of  
523 Human Airway Epithelial Cultures. *J Virol* **94**, doi:10.1128/JVI.00985-20 (2020).
- 524 25 Lieberman, N. A. P. *et al.* In vivo antiviral host transcriptional response to SARS-CoV-2  
525 by viral load, sex, and age. *PLoS Biol* **18**, e3000849, doi:10.1371/journal.pbio.3000849  
526 (2020).
- 527 26 Fiege, J. K. *et al.* Single cell resolution of SARS-CoV-2 tropism, antiviral responses, and  
528 susceptibility to therapies in primary human airway epithelium. *PLoS Pathog* **17**,  
529 e1009292, doi:10.1371/journal.ppat.1009292 (2021).
- 530 27 Rebendenne, A. *et al.* SARS-CoV-2 triggers an MDA-5-dependent interferon response  
531 which is unable to control replication in lung epithelial cells. *J Virol*, doi:10.1128/JVI.02415-  
532 20 (2021).
- 533 28 Lokugamage, K. G. *et al.* Type I Interferon Susceptibility Distinguishes SARS-CoV-2 from  
534 SARS-CoV. *J Virol* **94**, doi:10.1128/JVI.01410-20 (2020).
- 535 29 Felgenhauer, U. *et al.* Inhibition of SARS-CoV-2 by type I and type III interferons. *J Biol*  
536 *Chem* **295**, 13958-13964, doi:10.1074/jbc.AC120.013788 (2020).
- 537 30 Xie, X. *et al.* An Infectious cDNA Clone of SARS-CoV-2. *Cell Host Microbe* **27**, 841-848  
538 e843, doi:10.1016/j.chom.2020.04.004 (2020).
- 539 31 Chirkova, T. *et al.* CX3CR1 is an important surface molecule for respiratory syncytial virus  
540 infection in human airway epithelial cells. *J Gen Virol* **96**, 2543-2556,  
541 doi:10.1099/vir.0.000218 (2015).

- 542 32 Rot, A. & von Andrian, U. H. Chemokines in innate and adaptive host defense: basic  
543 chemokines grammar for immune cells. *Annu Rev Immunol* **22**, 891-928,  
544 doi:10.1146/annurev.immunol.22.012703.104543 (2004).
- 545 33 Boasso, A. *et al.* HIV inhibits CD4+ T-cell proliferation by inducing indoleamine 2,3-  
546 dioxygenase in plasmacytoid dendritic cells. *Blood* **109**, 3351-3359, doi:10.1182/blood-  
547 2006-07-034785 (2007).
- 548 34 Sharma, M. D. *et al.* Plasmacytoid dendritic cells from mouse tumor-draining lymph nodes  
549 directly activate mature Tregs via indoleamine 2,3-dioxygenase. *J Clin Invest* **117**, 2570-  
550 2582, doi:10.1172/JCI31911 (2007).
- 551 35 Vanderheiden, A. *et al.* Type I and Type III IFN Restrict SARS-CoV-2 Infection of Human  
552 Airway Epithelial Cultures. 2020.2005.2019.105437, doi:10.1101/2020.05.19.105437 %J  
553 bioRxiv (2020).
- 554 36 Onodi, F. *et al.* SARS-CoV-2 induces human plasmacytoid predendritic cell diversification  
555 via UNC93B and IRAK4. *J Exp Med* **218**, doi:10.1084/jem.20201387 (2021).
- 556 37 Swiecki, M. *et al.* Type I interferon negatively controls plasmacytoid dendritic cell numbers  
557 in vivo. *J Exp Med* **208**, 2367-2374, doi:10.1084/jem.20110654 (2011).
- 558 38 Macal, M. *et al.* Self-Renewal and Toll-like Receptor Signaling Sustain Exhausted  
559 Plasmacytoid Dendritic Cells during Chronic Viral Infection. *Immunity* **48**, 730-744 e735,  
560 doi:10.1016/j.immuni.2018.03.020 (2018).
- 561 39 Zuniga, E. I., Liou, L. Y., Mack, L., Mendoza, M. & Oldstone, M. B. Persistent virus infection  
562 inhibits type I interferon production by plasmacytoid dendritic cells to facilitate  
563 opportunistic infections. *Cell Host Microbe* **4**, 374-386, doi:10.1016/j.chom.2008.08.016  
564 (2008).
- 565

# Figure 1

A.

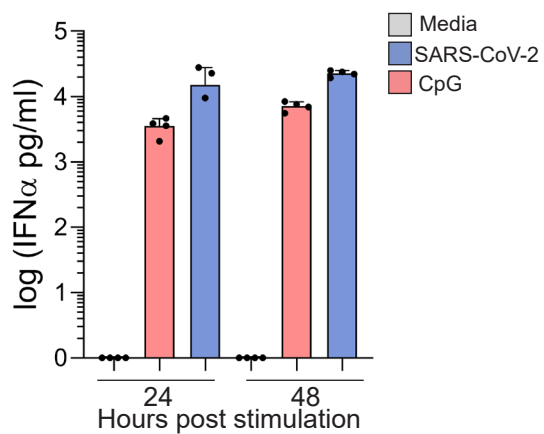

B.

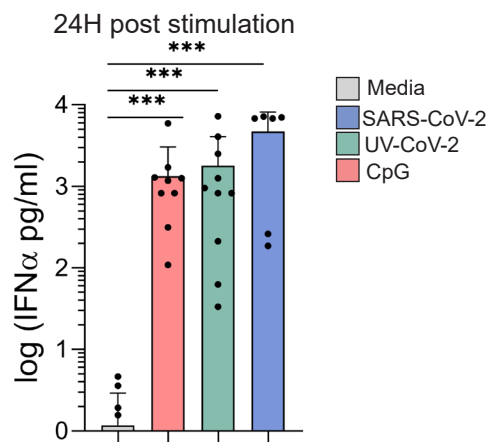

## Figure 2

**A.**

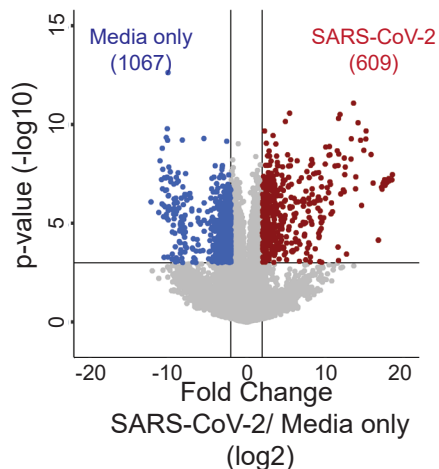

**B.**

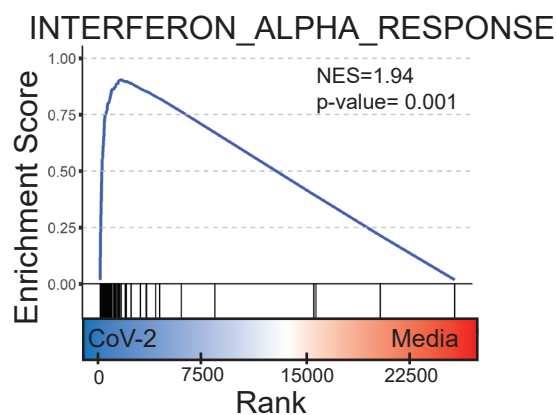

**C.**

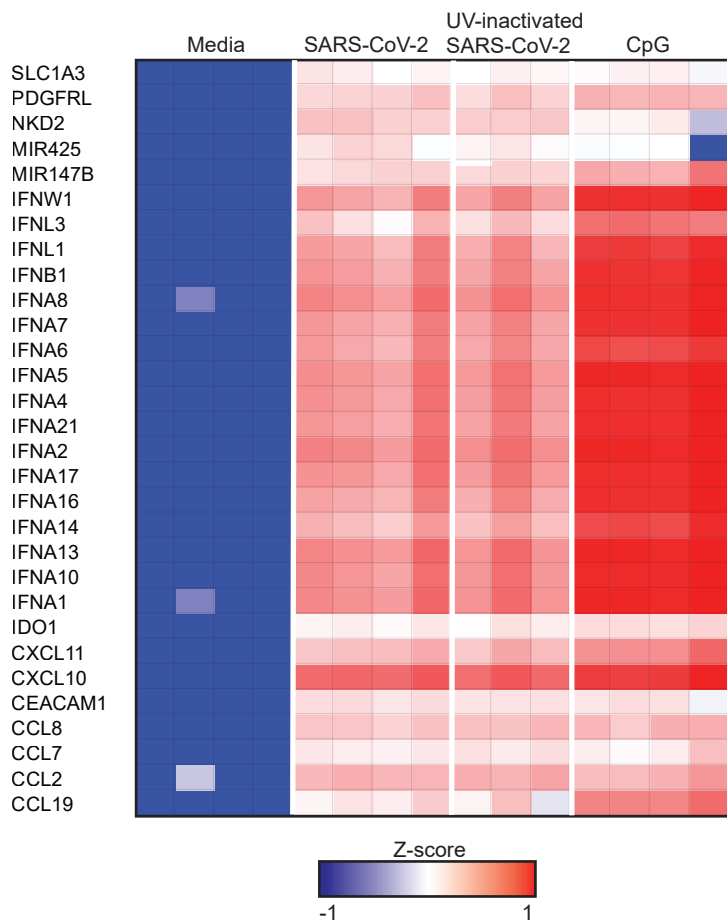

**D.**

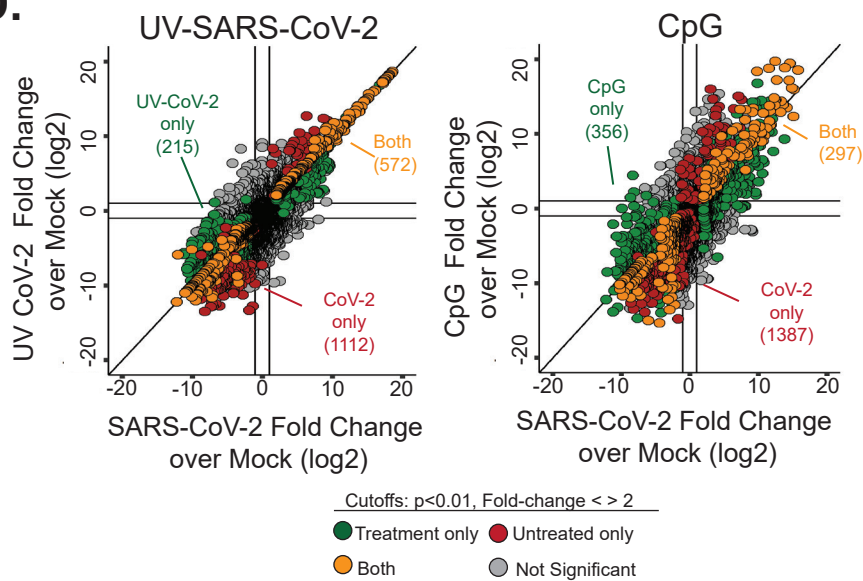

**E.**

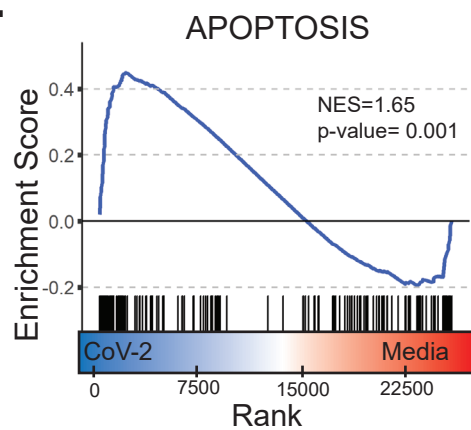

## Figure 3

A.

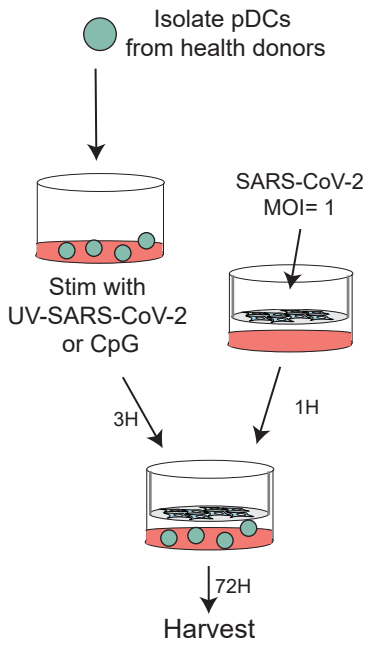

B.

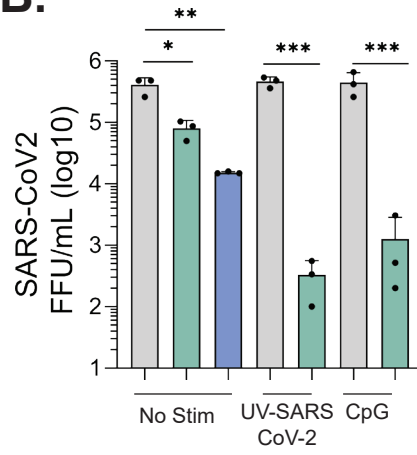

C.

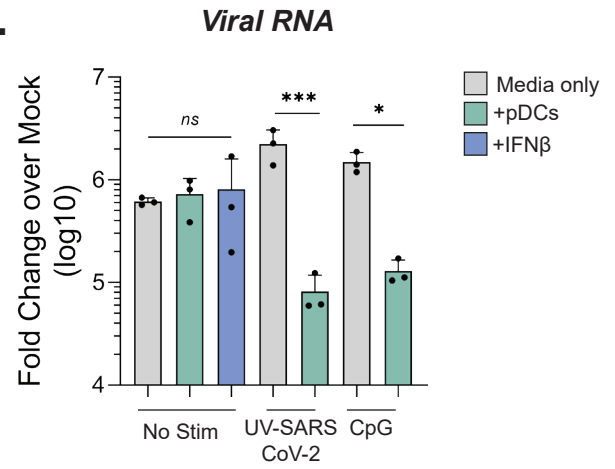

D.

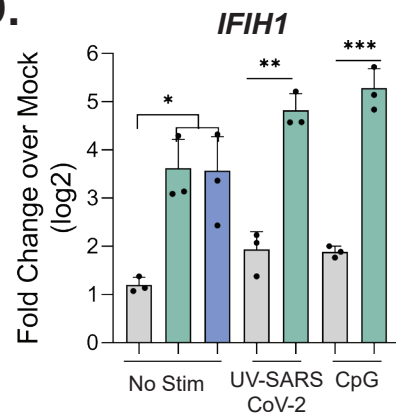

IFI2

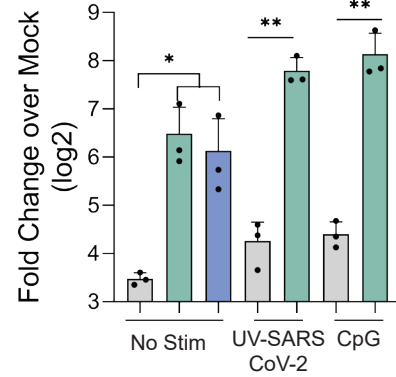

# Figure 4

**A.**

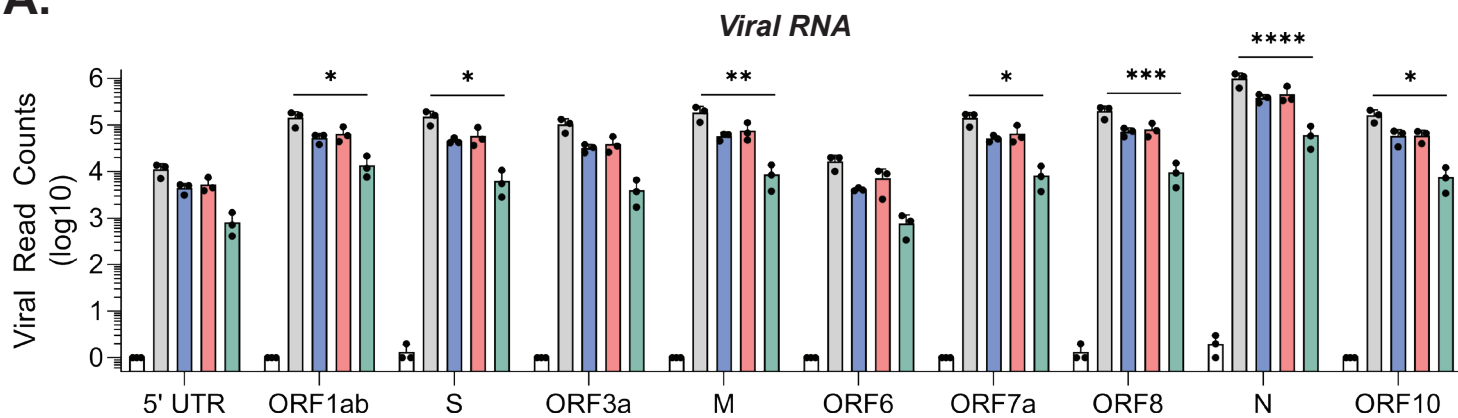

**B.**

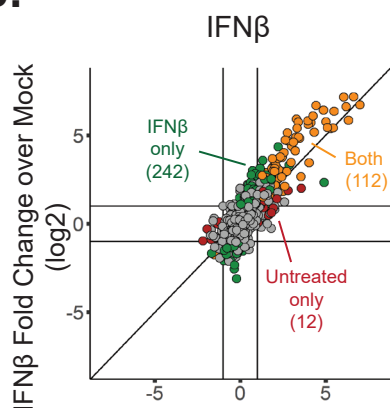

**C.**

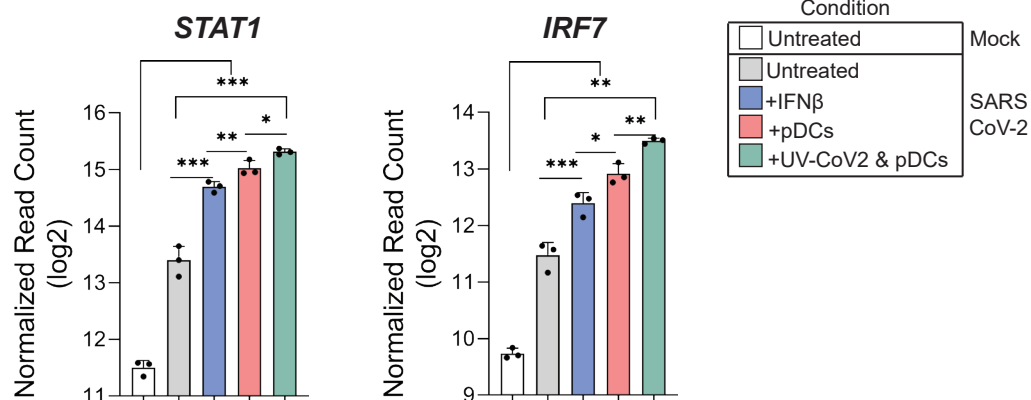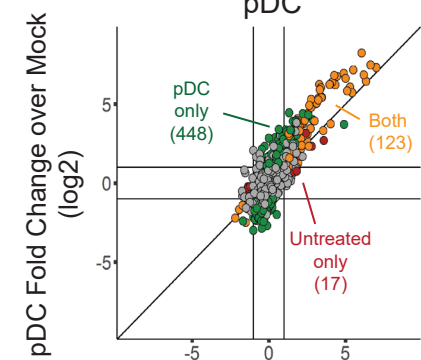

**D.**

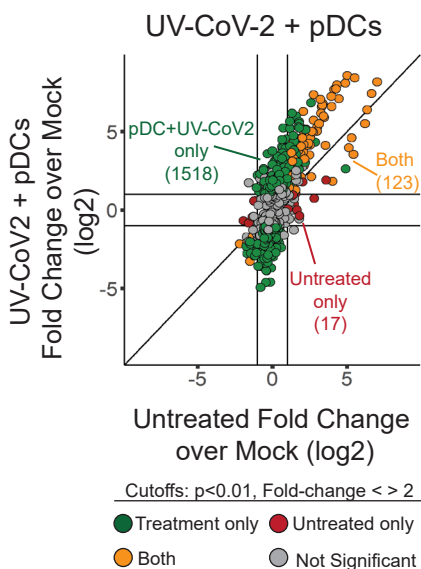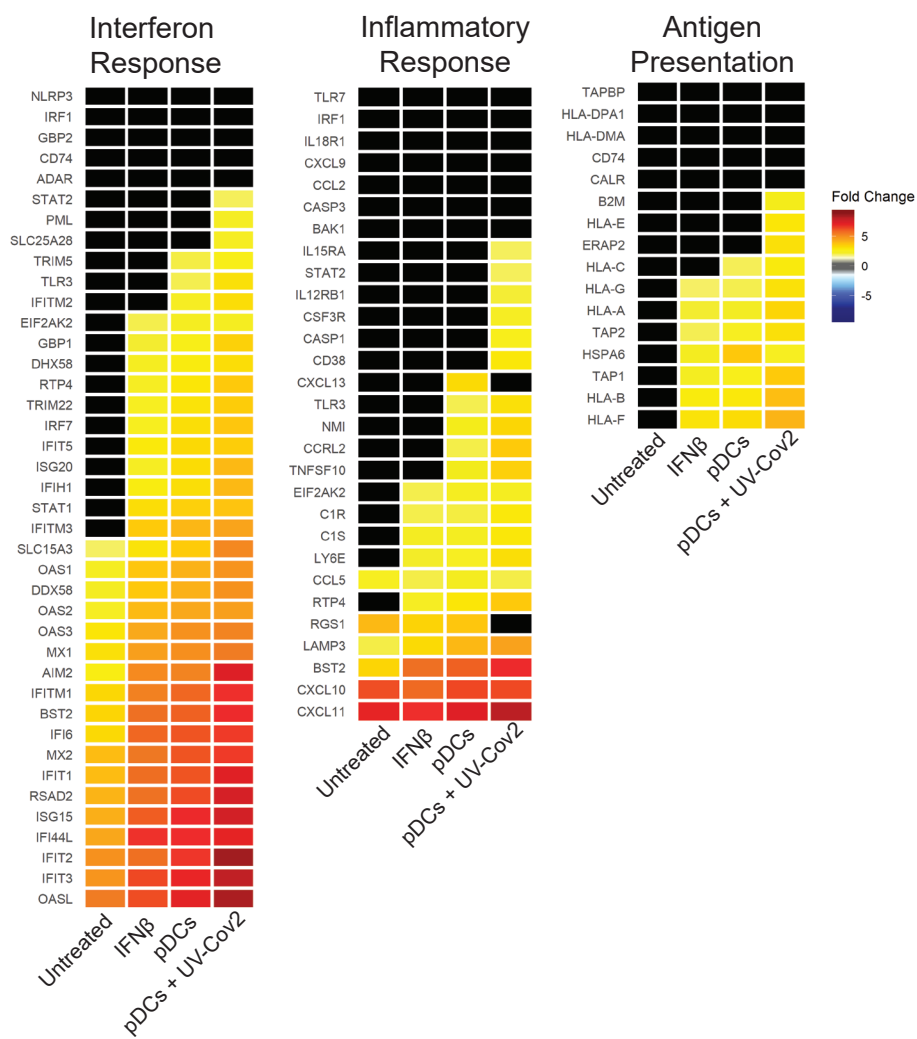

Source: http://biorxiv.org/content/10.1101/2021.05.12.443948v1.full.pdf
